# Supplementary material for: Ethyl lactate as a tunable solvent for the synthesis of aryl aldimines
Source: Royal Society of Chemistry journal article supplement (doi:10.1039/b817379f), 2009-01-01
Supplement: b817379f.pdf [file b817379f.pdf]

# Ethyl lactate as a tunable solvent for greener synthesis of aryl aldimines

Jacqueline S. Bennett,\* Kaitlyn L. Charles, Matthew R. Miner, Caitlin F. Heuberger, Elijah J. Spina, Michael F. Bartels, and Taylor Foreman

## Web Supplement

All reagents were used as received. Melting points were acquired on a BarlowWorld Scientific Limited SMP10 digital melting point apparatus. NMR spectra were acquired on a JEOL ECX-300 MHz spectrometer. EI-MS spectra were acquired on a Varian Saturn 2100T GC/MS/MS. IR spectra were acquired on a Varian 1000 Series FT-IR equipped with an ATR assembly.

Some starting materials are slow to dissolve. In these cases we heated these compounds in the presence of 1.5-4.5 mL of the solvent and then allowed the solution to cool to room temperature. All reactions, with the exception of **a**, were performed at room temperature.

- a. *N*-(4-nitrobenzylidene)-4-methoxyaniline (**a**): Yield: 94%, 133-134°C, orange plates. <sup>1</sup>H NMR (CDCl<sub>3</sub>): δ 8.6 (s, 1H, N=CH), 8.3 (d, J=8.2 Hz, 2H, Ar), 8.1 (d, J=8.6 Hz, 2H, Ar), 7.3 (d, J= 8.6 Hz, 2H, Ar), 7.0 (d, J= 8.2 Hz, 2H, Ar), 3.9 (s, 3H, CH<sub>3</sub>). <sup>13</sup>C NMR (CDCl<sub>3</sub>): δ 159.3, 154.9 (N=C), 143.8, 142.0, 129.2, 124.1, 122.7, 114.6, 55.6. MS (m/z, %): 257 (M<sup>+</sup>, 100), 258 (M+1, 18), 242 (74), 210 (21), 195 (24), 77 (23), 63 (21). IR: 1600, 1587, 1577, 1511, 1338, 1245, 1037, 844 cm<sup>-1</sup>
- b. *N*-(4-chlorobenzylidene)-4-methoxyaniline (**b**): Yield: 93%, 127-129°C, beige plates. <sup>1</sup>H NMR (CDCl<sub>3</sub>): δ 8.4 (s, 1H, N=CH), 7.8 (d, J= 8.6 Hz, 2H, Ar), 7.4 (d, J=8.6 Hz, 2H, Ar), 7.2 (d, J=8.6 Hz, 2H, Ar), 6.9 (d, J=8.6 Hz, 2H, Ar), 3.8 (s, 3H, OCH<sub>3</sub>); <sup>13</sup>C NMR (CDCl<sub>3</sub>): δ 158.6, 156.8, 144.5, 137.0, 134.8, 129.8, 129.1, 122.4, 114.5, 55.6. MS (m/z, %) 245 (M<sup>+</sup>, 100), 246 (M+1, 22), 247 (M+2, 36), 233 (28), 232 (19), 231 (70), 167 (16), 78 (17), 63 (31), 50 (16). IR: 1621, 1600, 1576, 1506, 1253, 839 cm<sup>-1</sup>
- c. *N*-cinnamylidene-4-methoxyaniline (**c**): Yield: 96%, 119-120°C, yellow plates. <sup>1</sup>H NMR (CDCl<sub>3</sub>): δ 8.3 (dd, J=5.2,3.1 Hz, 1H, N=CH), 7.5 (dd, J=8.0, 1.5 Hz, 2H, Ar), 7.2 (d, J=9.1 Hz, 3H, Ar), 7.1 (m, 4H, Ar & CH=CH), 6.9 (d, J=9 Hz, 2H, Ar), 3.8 (s, 3H, OCH<sub>3</sub>). <sup>13</sup>C NMR (CDCl<sub>3</sub>): δ 159.7 (N=C), 158.5, 144.5, 143.2, 135.8, 129.0, 128.9, 127.5, 122.3, 114.5, 55.6. MS (m/z, %): 237 (M<sup>+</sup>, 100), 238 (M+1, 51), 239 (M+2, 10), 222(17), 194 (13), 115 (44), 77 (25), 63 (24). IR: 1627, 1606, 1578, 1504, 1468, 1448, 1245, 829, 745, 692 cm<sup>-1</sup>
- d. *N*-(4-methoxybenzylidene)-4-methoxyaniline (**d**): Yield: 93%, 144°C, gray plates. <sup>1</sup>H NMR (CDCl<sub>3</sub>): 8.4 (s, 1H, N=CH), 7.8 (d, J=8.6, 2H, Ar), 7.2 (d, J=9.1 Hz, 2H, Ar), 7.0 (d, J=8.6 Hz, 2H, Ar), 6.9 (d, J=9.1 Hz, 2H, Ar), 3.9 (s, 3H, OCH<sub>3</sub>), 3.8 (s, 3H, OCH<sub>3</sub>). <sup>13</sup>C NMR (CDCl<sub>3</sub>): 161.9, 158.0 (N=C), 145.4, 130.3, 129.6, 122.2, 114.4, 114.2, 55.6, 55.5 ). MS (m/z, %): 242 (M<sup>+</sup>, 100), 243 (M+1, 21), 227 (83), 77 (15), 63 (17). IR 1620, 1606, 1576, 1509, 1470, 1240, 1169, 1028, 840 cm<sup>-1</sup>
- e. *N*-(4-chlorobenzylidene)-4-toluidine (**e**): Yield: 96%, 124-125°C, cream plates. <sup>1</sup>H NMR (CDCl<sub>3</sub>): δ 8.4 (s, 1H, N=CH), 7.8 (d, J=8.7 Hz, 2H, Ar), 7.4 (d, J=8.2 Hz, 2H, Ar), 7.2 (d, J=8.3 Hz, 2H, Ar), 7.1 (d, J=8.7 Hz, 2H, Ar), 2.4 (s, 3H, CH<sub>3</sub>). <sup>13</sup>C NMR (CDCl<sub>3</sub>): δ : 158.1 (N=C), 149.1, 137.3, 136.2, 134.8, 129.95, 129.92, 129.2, 120.9, 21.1 MS (m/z, %): 230 (M<sup>+</sup>, 100), 231

(M+1, 56), 232 (M+2, 38), 229 (85), 91 (64), 77 (12), 65 (40). 1625, 1567, 1545, 1506, 1085, 1013, 829, 670  $\text{cm}^{-1}$

- f. MeOH *N*-(4-hydroxybenzylidene)-4-toluidine (**f**): Yield: 90%, 217-220°C, white plates.  $^1\text{H}$  NMR (DMSO- $d_6$ ):  $\delta$  10.1 (s, 1H, OH), 8.4 (s, 1H, N=CH), 7.7 (d,  $J=8.7$  Hz, 2H, Ar), 7.2 (d,  $J=8.7$  Hz, 2H, Ar), 7.1 (d,  $J=8.7$  Hz, 2H, Ar), 6.9 (d,  $J=8.7$  Hz, 2H, Ar), 2.3 (s, 3H, CH<sub>3</sub>).  $^{13}\text{C}$  NMR (DMSO- $d_6$ ):  $\delta$  161.0, 160.0 (N=C), 149.9, 135.1, 131.1, 130.1, 128.2, 121.3, 116.2, 21.1. MS (m/z, %): 211 (M<sup>+</sup>, 100), 212 (M+1, 13), 91 (33), 77 (19), 65 (37), 63 (13). IR: 1606, 1601, 1577, 1514, 1510, 1444, 1287, 1164, 839, 649  $\text{cm}^{-1}$
- g. *N*-(2-hydroxybenzylidene)-4-toluidine (**g**): Yield: 97%, 94°C, yellow needles (strongly fluorescent under UV light).  $^1\text{H}$  NMR (CDCl<sub>3</sub>):  $\delta$  13.4 (s, 1H, OH), 8.6 (s, 1H, N=CH), 7.4 (m, 1H, Ar), 7.2 (m, 4H, Ph), 7.0 (d,  $J=8$  Hz, 1H, Ar), 6.9 (dt,  $J=7, 1.2$  Hz, 2H, Ar), 2.4 (s, 3H, CH<sub>3</sub>).  $^{13}\text{C}$  NMR (CDCl<sub>3</sub>):  $\delta$  161.8, 161.2 (N=C), 145.8, 137.0, 133.0, 132.2, 130.1, 121.1, 119.1, 117.3, 21.2. MS (m/z, %): 211 (M<sup>+</sup>, 100), 212 (M+1, 19), 210 (89), 92 (42), 78 (18), 65 (38). IR: 1619, 1599, 1571, 1540, 1511, 1284, 817, 762, 642  $\text{cm}^{-1}$
- h. *N*-(4-chlorobenzylidene)aniline (**h**): Yield: 95%, 63-64°C, very pale yellow plates.  $^1\text{H}$  NMR (CDCl<sub>3</sub>):  $\delta$  8.4 (s, 1H, N=CH), 7.9 (d,  $J=8.7$  Hz, 2H, Ar), 7.4 (m, 4H, Ar), 7.2 (m, 3H, Ar).  $^{13}\text{C}$  NMR (CDCl<sub>3</sub>):  $\delta$  159.0 (N=C), 151.7, 137.5, 134.8, 130.1, 129.3, 129.2, 126.3, 121.0. MS (m/z, %): 215 (M<sup>+</sup>, 100), 217 (M+2, 34), 104 (16), 77 (87), 63 (12). IR: 1624, 1589, 1567, 1488, 1088, 829, 760, 696  $\text{cm}^{-1}$
- i. *N*-(4-bromobenzylidene)aniline (**i**): Yield: 99%, 71-72°C, white plates.  $^1\text{H}$  NMR (CDCl<sub>3</sub>):  $\delta$  8.4 (s, 1H, N=CH), 7.8 (d,  $J=8.2$  Hz, 2H, Ar), 7.43 (d,  $J=8.2$  Hz, 2H, Ar), 7.41 (m, 2H, Ar), 7.2 (m, 3H, Ar).  $^{13}\text{C}$  NMR (CDCl<sub>3</sub>):  $\delta$  159.0, 151.6, 135.1, 132.1, 130.2, 129.3, 126.3, 125.9, 120.9. MS (m/z, %): 259 (M<sup>+</sup>, 49), 260 (M+1, 62), 261 (M+2, 84), 261 (M+2, 73), 104 (16), 77 (100), 63 (14), 51 (46). IR: 1622, 1584, 1564, 1487, 1070, 1008, 880, 823, 764, 696  $\text{cm}^{-1}$
- j. *N*-cinnamylideneaniline (**j**): Yield: 98%, 108-109°C, yellow plates.  $^1\text{H}$  NMR (CDCl<sub>3</sub>): 8.3 (dd,  $J=6.6$  Hz, 2.0 Hz, 1H, N=CH), 7.5 (m, 2H, Ar), 7.4 (m, 5H, Ar), 7.2 (m, 5H, Ar & CH=CH).  $^{13}\text{C}$  NMR (CDCl<sub>3</sub>): 161.8, 151.8, 144.2, 135.7, 129.7, 129.3, 129.0, 128.7, 127.6, 126.2, 121.0. MS (m/z, %): 207 (M<sup>+</sup>, 100), 208 (M+1, 33), 128 (17), 77 (41), 51 (31). IR: 1625, 1600, 1575, 1484, 1447, 750, 688  $\text{cm}^{-1}$
- k. *N*-(4-hydroxybenzylidene)aniline (**k**): Yield: >99%, 193-194°C, pale yellow plates.  $^1\text{H}$  NMR (acetone- $d_6$ ):  $\delta$  9.0 (s, 1H, OH), 8.4 (s, 1H, N=CH), 7.8 (d,  $J=8.7$  Hz, 2H, Ar), 7.4 (m, 2H, Ar), 7.2 (m, 3H, Ar), 7.0 (d,  $J=8.7$  Hz, 2H, Ar).  $^{13}\text{C}$  NMR (acetone- $d_6$ ): 160.6, 159.7 (N=C), 152.7, 130.7, 129.1, 128.7, 125.3, 120.9, 115.7. MS (m/z, %): 197 (M<sup>+</sup>, 100), 197 (M+, 73), 198 (M+1, 11), 84 (14), 77 (75), 76 (14), 65 (16), 63 (12), 51 (43), 50 (19). IR: 1613, 1603, 1580, 1516, 1445, 1286, 1191, 1166, 841, 759, 690  $\text{cm}^{-1}$
- l. *N*-(4-bromobenzylidene)-4-chloroaniline (**l**): Yield: 96%, 119-120°C, white plates.  $^1\text{H}$  NMR (CDCl<sub>3</sub>):  $\delta$  8.4 (s, 1H, N=CH), 7.8 (d,  $J=8.7$  Hz, 2H, Ar), 7.51 (d,  $J=8.7$  Hz, 2H, Ar), 7.45 (d,  $J=8.7$  Hz, 2H, Ar), 7.1 (d,  $J=8.7$  Hz, 2H, Ar).  $^{13}\text{C}$  NMR (CDCl<sub>3</sub>):  $\delta$  159.3 (N=C), 150.6, 137.6, 134.3, 132.4, 130.1, 129.3, 122.7, 120.0, 116.8. MS (m/z, %): 293 (M<sup>+</sup>, 34), 294 (M+1, 65), 295 (M+2, 99), 295 (M+2, 100), 296 (m+3, 38), 297 (M+4, 27), 157 (21), 155 (22), 89 (19), 76 (48), 75 (57), 74 (20), 63 (25), 50 (43). IR: 1622, 1598, 1568, 1489, 1071, 833  $\text{cm}^{-1}$

- m. *N*-benzylidene-4-bromoaniline (**m**): Yield: 93%, 66-68°C, yellow prisms. <sup>1</sup>H NMR (CDCl<sub>3</sub>): δ 8.4 (s, 1H, N=CH), 7.9 (d, J=7.4, 2H, Ar), 7.5 (m, 5H, Ar), 7.3 (s, 1H, Ar), 7.1 (d, J=7.0 Hz, 2H, Ar). <sup>13</sup>C NMR (CDCl<sub>3</sub>): δ 160.9 (HC=NR), 151.1, 136.0, 132.3, 131.8, 129.0, 128.9, 122.7, 119.4. MS (m/z, %): 259 (M<sup>+</sup>, 55), 260 (M+1, 88), 261 (M+2, 92), 89 (12), 77 (26), 76 (26), 75 (22), 63 (18). IR: 1626, 1577, 1489, 1190, 1007, 820, 760, 692, 670 cm<sup>-1</sup>
- n. *N*-(2-hydroxybenzylidene)-4-bromoaniline (**n**): Yield: 96%, 111°C, yellow needles. <sup>1</sup>H NMR (CDCl<sub>3</sub>): δ 13.0 (s, 1H, OH), 8.6 (s, 1H, N=CH), 7.5 (d, J=8.7 Hz, 2H, Ar), 7.4 (d, J=7.4 Hz, 2H, Ar), 7.1 (d, J=8.7, 2H, Ar), 7.03 (d, J=8.3 Hz, 1H, Ar), 6.95 (dt, J=7.5, 0.8 Hz, 1H, Ar). <sup>13</sup>C NMR (CDCl<sub>3</sub>): δ 163.1, 161.2 (N=C), 147.6, 133.6, 132.6, 132.5, 122.9, 119.3, 119.1, 117.4. <sup>13</sup>C NMR (CDCl<sub>3</sub>): 163.1 (N=C), 161.2, 147.6, 133.6, 132.60, 132.56, 122.9, 119.3, 119.1, 117.4. MS (m/z, %): 275 (M<sup>+</sup>, 90), 276 (M+1, 82), 277 (M+2, 100), 278 (M+3, 13), 196 (19), 195 (19), 167 (19), 157 (19), 155 (21), 120 (24), 102 (15), 91 (17), 84 (21), 77 (39), 76 (47), 75 (43), 74 (19), 73 (16), 65 (23), 63 (31). IR: 1615, 1569, 1482, 1283, 1187, 1009, 829, 755 cm<sup>-1</sup>
- o. *N*-(4-chlorobenzylidene)-4-chloroaniline (**o**): Yield: 97%, 110-111°C, green plates. <sup>1</sup>H NMR (CDCl<sub>3</sub>): δ 8.4 (s, 1H, N=CH), 7.8 (d, J=8.7 Hz, 2H, Ar), 7.5 (d, J=8.2 Hz, 2H, Ar), 7.4 (d, J=8.7 Hz, 2H, Ar), 7.1 (d, J=8.2 Hz, 2H, Ar). <sup>13</sup>C NMR (CDCl<sub>3</sub>): δ 159.2 (N=C), 150.2, 137.7, 134.5, 131.8, 130.1, 129.4, 129.3, 122.3. MS (m/z, %): 249 (M<sup>+</sup>, 86), 250 (M+1, 100), 251 (M+2, 89), 252 (M+3, 67), 253 (M+4, 23), 149 (23), 138 (22), 113 (30), 111 (89), 77 (20), 75 (95), 63 (23). IR 1626, 1591, 1567, 1489, 1401, 1193, 1086, 1011, 886, 833 cm<sup>-1</sup>
- p. *N*-cinnamylidene-4-chloroaniline (**p**): Yield: 97%, 105°C, yellow needles. <sup>1</sup>H NMR (CDCl<sub>3</sub>): δ 8.2 (d, J=7.4 Hz, 1H, N=CH), 7.5 (m, 2H, Ar), 7.4 (m, 3H, Ar), 7.36 (m, 4H, Ar & C=C), 7.1 (m, 2H Ar). <sup>13</sup>C NMR (CDCl<sub>3</sub>): δ 162.1 (N=C), 150.2, 144.8, 135.5, 131.8, 129.9, 129.4, 129.1, 128.3, 127.7, 122.4. MS (m/z, %): 240 (M<sup>+</sup>, 100), 241 (M+1, 34), 242 (M+2, 39), 209 (15), 207 (19), 128 (40), 115 (18), 111 (28), 77 (29), 75 (38). IR: 1626, 1603, 1593, 1575, 1486, 1103, 833, 751, 691, 647 cm<sup>-1</sup>
- q. *N*-(2-hydroxybenzylidene)-4-chloroaniline (**q**): Yield: 96%, 104°C, yellow needles. <sup>1</sup>H NMR (CDCl<sub>3</sub>): δ 13.0 (s, 1H, OH), 8.6 (s, 1H, N=CH), 7.4 (m, 4H, Ar), 7.3 (m, 2H, Ar), 7.0 (d, 8.7 Hz, 1H, Ar), 6.9 (t, J=7.6 Hz, 1H, Ar). <sup>13</sup>C NMR (CDCl<sub>3</sub>): δ 163.1, 161.2 (N=X), 133.6, 132.5, 129.7, 122.6, 119.3, 117.4. MS (m/z, %): 231 (M<sup>+</sup>, 100), 232 (M+1, 42), 233 (M+2, 33), 113 (13), 111 (37), 84 (26), 77 (29), 75 (47), 65 (224), 63 (21). 3409, 1639, 1611, 1568, 1487, 1273, 1091, 838, 756, 699 cm<sup>-1</sup>
